# Supplementary material for: Development and function of human cerebral cortex neural networks from pluripotent stem cells in vitro
Source: Oxford University Press journal article supplement (doi:10.1242/dev.123851), 2015-09-15
Supplement: dev123851supp.pdf [file dev123851supp.pdf]

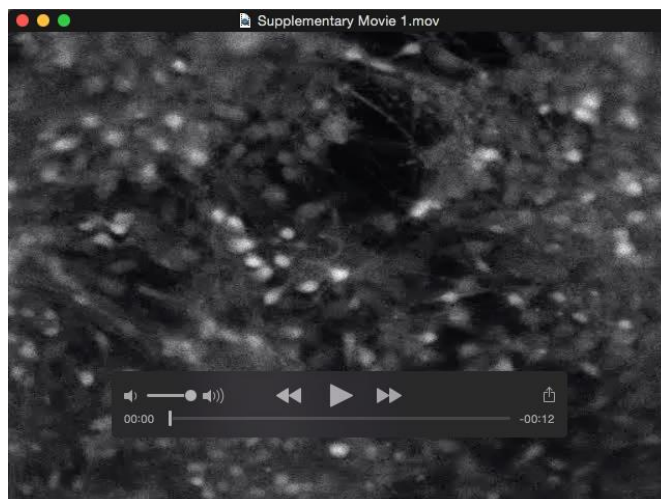

**Supplementary Movie 1:** Calcium imaging recording of day 58 cortical neurons showing a single synchronised burst.

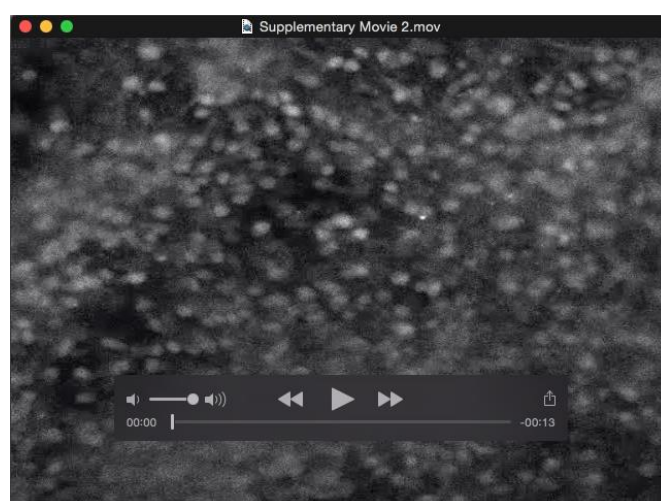

**Supplementary Movie 2:** Calcium imaging recording of day 64 cortical neurons showing a multiple synchronised bursts.

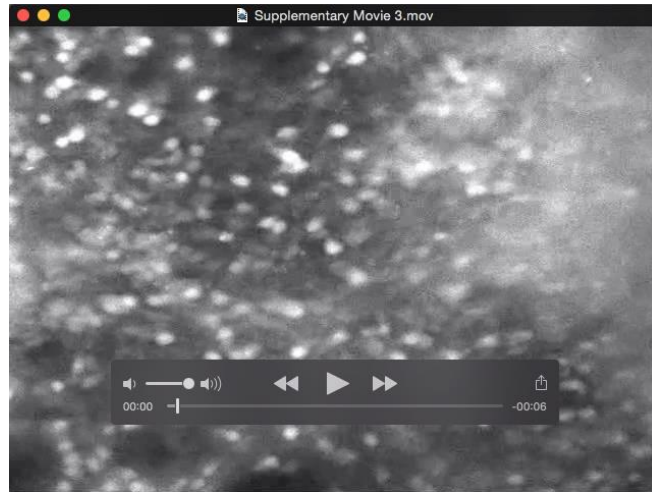

**Supplementary Movie 3:** Calcium imaging recording of day 70 cortical neurons showing sustained synchronised bursts.

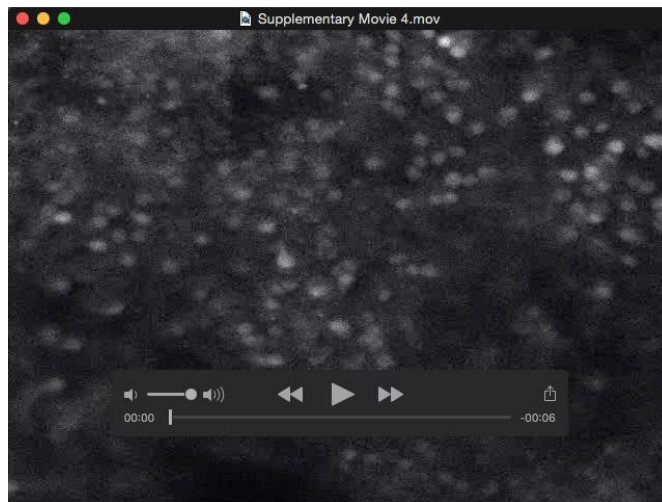

**Supplementary Movie 4:** Calcium imaging recording of day 77 cortical neurons showing multiple synchronised bursts.

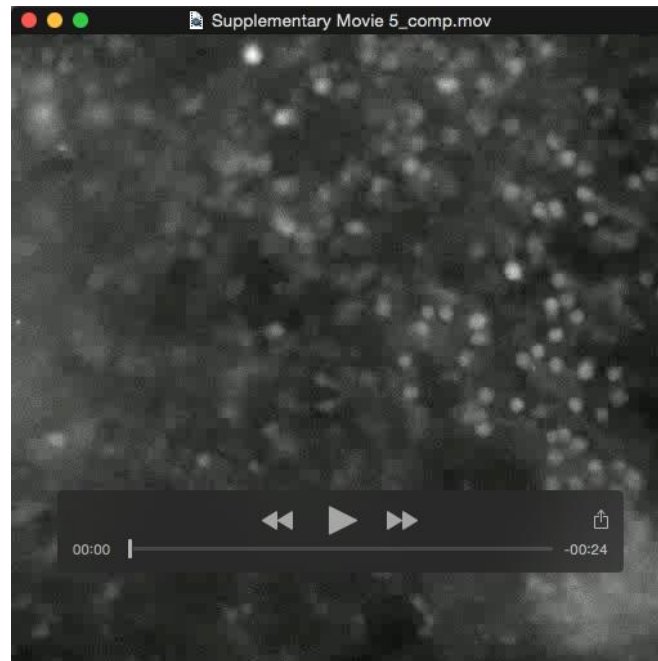

**Supplementary Movie 5:** Calcium imaging recording of day 108 cortical neurons showing complex network activity.

**Supplementary Table 1:** Breakdown of whole cell electrophysiological properties.

| <b>BBHX</b>                        |           |           |            |           |
|------------------------------------|-----------|-----------|------------|-----------|
| <b>Day</b>                         | <b>63</b> | <b>69</b> | <b>76</b>  | <b>78</b> |
| <b>Resting Membrane Potential</b>  | -30       | -50       | -42        | -45       |
| <b>mV</b>                          | -44       | -28       | -38        | -45       |
|                                    | -45       | -38       | -43        | -54       |
|                                    | -35       | -38       | -54        | -40       |
|                                    | -48       | -41       | -43        | -43       |
|                                    | -37       |           | -50        | -40       |
|                                    |           |           |            |           |
| <b>Action Potential Height</b>     | 10        | 58.9      | 56         | 50        |
| <b>mV</b>                          | 31.05     | 50.2      | 82         | 49.9      |
|                                    | 54.9      | 44.5      | 63         | 45        |
|                                    | 43        | 56        | 64         | 51.1      |
|                                    | 25.2      | 55.4      | 66         | 51        |
|                                    | 31.1      | 55.6      | 73         | 48        |
|                                    |           |           |            |           |
| <b>Number of spikes</b>            | 1         | 5         | 1          | 2         |
| <b>(1 second 10pA stimulation)</b> | 1         | 3         | 3          | 3         |
|                                    | 1         | 1         | 2          | 1         |
|                                    | 1         | 1         | 3          | 1         |
|                                    | 1         | 1         | 7          | 6         |
|                                    | 1         | 2         | 3          | 3         |
|                                    |           |           |            |           |
| <b>Input resistance</b>            | 7.5       | 3.4       | 4.5        | 0.8       |
| <b>gΩ</b>                          | 3         | 4.5       | 2.6        | 3.9       |
|                                    | 4.1       | 4.2       | 1.4        | 3.6       |
|                                    | 1.8       | 3.2       | 3.5        | 2.4       |
|                                    | 3.3       | 4.1       | 5.5        | 3.5       |
|                                    | 2.1       | 3.9       | 2          | 3.3       |
|                                    |           |           |            |           |
| <b>CRL</b>                         |           |           |            |           |
| <b>Day</b>                         | <b>50</b> | <b>73</b> | <b>100</b> |           |
| <b>Resting Membrane Potential</b>  | -35       | -43       | -52        |           |
| <b>mV</b>                          | -48       | -53       | -50        |           |

|                                    |           |           |      |  |
|------------------------------------|-----------|-----------|------|--|
|                                    | -50       | -47       | -58  |  |
|                                    | -38       | -52       |      |  |
|                                    | -55       | -47       |      |  |
|                                    | -40       | -57       |      |  |
|                                    |           |           |      |  |
| <b>Action Potential Height</b>     | 60        | 49.6      | 64.6 |  |
| <b>mV</b>                          | 40.6      | 57.1      | 62.9 |  |
|                                    | 60.3      | 56        | 66.4 |  |
|                                    |           | 51.8      |      |  |
|                                    |           | 58.1      |      |  |
|                                    |           | 50.1      |      |  |
|                                    |           |           |      |  |
| <b>Number of spikes</b>            | 1         | 1         | 2    |  |
| <b>(1 second 10pA stimulation)</b> | 2         | 2         | 3    |  |
|                                    | 1         | 2         | 13   |  |
|                                    | 1         | 2         |      |  |
|                                    | 1         | 4         |      |  |
|                                    |           | 3         |      |  |
|                                    |           |           |      |  |
| <b>Input resistance</b>            | 7.5       | 4.6       | 3.3  |  |
| <b>gΩ</b>                          | 5.6       | 2.8       | 3.9  |  |
|                                    | 6.1       | 4         | 2.3  |  |
|                                    | 6.2       | 4.1       |      |  |
|                                    |           | 3.5       |      |  |
|                                    |           | 3.8       |      |  |
|                                    |           |           |      |  |
|                                    |           |           |      |  |
| <b>2F8</b>                         |           |           |      |  |
| <b>Day</b>                         | <b>85</b> | <b>96</b> |      |  |
| <b>Resting Membrane Potential</b>  |           |           |      |  |
| <b>mV</b>                          | -63       | -51       |      |  |
|                                    | -46       | -56       |      |  |
|                                    | -50       | -53       |      |  |
|                                    | -35       |           |      |  |
|                                    | -42       |           |      |  |
|                                    |           |           |      |  |
| <b>Action Potential Height</b>     | 70.4      | 69.4      |      |  |

|                                    |           |     |  |  |
|------------------------------------|-----------|-----|--|--|
| <b>mV</b>                          | 61.2      | 69  |  |  |
|                                    | 45        | 70  |  |  |
|                                    | 39        |     |  |  |
|                                    | 75.9      |     |  |  |
|                                    |           |     |  |  |
|                                    |           |     |  |  |
| <b>Number of spikes</b>            | 2         | 5   |  |  |
| <b>(1 second 10pA stimulation)</b> | 4         | 6   |  |  |
|                                    | 3         | 6   |  |  |
|                                    | 1         |     |  |  |
|                                    | 3         |     |  |  |
|                                    |           |     |  |  |
| <b>Input resistance</b>            | 3.6       | 3.4 |  |  |
| <b>gΩ</b>                          | 3         | 1.5 |  |  |
|                                    | 2.8       | 2.4 |  |  |
|                                    | 3.5       |     |  |  |
|                                    | 3.1       |     |  |  |
|                                    |           |     |  |  |
| <b>JRO</b>                         |           |     |  |  |
| <b>Day</b>                         | <b>71</b> |     |  |  |
| <b>Resting Membrane Potential</b>  |           |     |  |  |
| <b>mV</b>                          | -50       |     |  |  |
|                                    | -60       |     |  |  |
|                                    | -63       |     |  |  |
|                                    | -62       |     |  |  |
|                                    | -30       |     |  |  |
|                                    | -42       |     |  |  |
|                                    |           |     |  |  |
| <b>Action Potential Height</b>     | 66        |     |  |  |
| <b>mV</b>                          | 44.9      |     |  |  |
|                                    | 61.7      |     |  |  |
|                                    | 67.3      |     |  |  |
|                                    | 49.2      |     |  |  |
|                                    | 50        |     |  |  |
|                                    |           |     |  |  |
| <b>Number of spikes</b>            | 4         |     |  |  |
| <b>(1 second 10pA</b>              | 1         |     |  |  |

|                             |     |  |  |  |
|-----------------------------|-----|--|--|--|
| <b>stimulation)</b>         |     |  |  |  |
|                             | 3   |  |  |  |
|                             | 2   |  |  |  |
|                             | 1   |  |  |  |
|                             | 1   |  |  |  |
|                             |     |  |  |  |
| <b>Input Resistance</b>     | 3.8 |  |  |  |
| <b>g<math>\Omega</math></b> | 2.5 |  |  |  |
|                             | 5.3 |  |  |  |
|                             | 3.4 |  |  |  |
|                             | 3.1 |  |  |  |
|                             | 5.2 |  |  |  |
|                             |     |  |  |  |
